# Supplementary material for: Trace element levels in Italian honeybees and wild plants: which factors matter?
Source: Springer Nature journal article supplement (doi:10.1007/s13592-025-01194-9), 2025-07-04
Supplement: MOESM2 [file 13592_2025_1194_MOESM2_ESM.docx]

**Trace element levels in Italian honeybees and wild plants: which factors matter?**

Apidologie

Gloria Isani1,2, Cecilia Rudelli 1*, Giulia Andreani1, Micaela Fabbri1, Chiara Suanno3, Luigi Parrotta3, Stefano Del Duca2,3

**Corresponding author:** Cecilia Rudelli,Department of Veterinary Medical Sciences, Alma Mater Studiorum-University of Bologna, Via Tolara di Sopra 50, Ozzano dell’Emilia, 40064 Bologna, Italy.

cecilia.rudelli2@unibo.it (Cecilia Rudelli)

**Supplementary Figure S2** Levels of trace elements in honey samples obtained from the six farms included in this study. Data are expressed in µg/g wet weight.
