# Supplementary material for: Trace element levels in Italian honeybees and wild plants: which factors matter?
Source: Springer Nature journal article supplement (doi:10.1007/s13592-025-01194-9), 2025-07-04
Supplement: MOESM3 [file 13592_2025_1194_MOESM3_ESM.docx]

**Trace element levels in Italian honeybees and wild plants: which factors matter?**

Apidologie

Gloria Isani1,2, Cecilia Rudelli 1*, Giulia Andreani1, Micaela Fabbri1, Chiara Suanno3, Luigi Parrotta3, Stefano Del Duca2,3

**Corresponding author:** Cecilia Rudelli,Department of Veterinary Medical Sciences, Alma Mater Studiorum-University of Bologna, Via Tolara di Sopra 50, Ozzano dell’Emilia, 40064 Bologna, Italy.

cecilia.rudelli2@unibo.it (Cecilia Rudelli)

**Supplementary Table SI.** Hive localization, farm dimension in term of number of hives and management of the apiary are indicated.

| Apiary | Region | Apiary management | Apiary Dimension |
| --- | --- | --- | --- |
| 1 | Emilia Romagna | Organic | Small 200/300 hives |
| 2 | Veneto | Conventional | Small 200/300 hives |
| 3 | Abruzzo | Organic | Medium 900/1300 hives |
| 4 | Abruzzo | Conventional | Medium 900/1300 hives |
| 5 | Abruzzo | Organic | Big > 1300 hives |
| 6 | Friuli Venezia Giulia | Conventional | Big > 1300 hives |
