# Supplementary material for: Trace element levels in Italian honeybees and wild plants: which factors matter?
Source: Springer Nature journal article supplement (doi:10.1007/s13592-025-01194-9), 2025-07-04
Supplement: MOESM4 [file 13592_2025_1194_MOESM4_ESM.docx]

**Trace element levels in Italian honeybees and wild plants: which factors matter?**

Apidologie

Gloria Isani1,2, Cecilia Rudelli 1*, Giulia Andreani1, Micaela Fabbri1, Chiara Suanno3, Luigi Parrotta3, Stefano Del Duca2,3

**Corresponding author:** Cecilia Rudelli,Department of Veterinary Medical Sciences, Alma Mater Studiorum-University of Bologna, Via Tolara di Sopra 50, Ozzano dell’Emilia, 40064 Bologna, Italy.

cecilia.rudelli2@unibo.it (Cecilia Rudelli)

**Supplementary Table SII.** Cadmium and lead levels in bees sampled on the six apiaries. Values are given as the mean ± SD and expressed in µg/g fresh weight and divided by sampling: T1, sampling in April 2022 and T2, sampling in July 2022. Na: at T2 it was not possible to obtain honey bee samples from apiary 3. The detection limits (LOD) were 0.05 µg/mL for Cd and 0.4 µg/mL for Pb.

|  | Cd |  | Pb |  |
| --- | --- | --- | --- | --- |
|  | T1 | T2 | T1 | T2 |
| Apiary 1 | <LOD | <LOD | <LOD | <LOD |
| Apiary 2 | <LOD | <LOD | <LOD | <LOD |
| Apiary 3 | <LOD | na | 2.25±7.08 | na |
| Apiary 4 | <LOD | <LOD | <LOD | 0.83±0.90 |
| Apiary 5 | <LOD | <LOD | <LOD | <LOD |
| Apiary 6 | 0.09±0.07 | 0.11±0.05 | <LOD | <LOD |
