# Supplementary material for: Trace element levels in Italian honeybees and wild plants: which factors matter?
Source: Springer Nature journal article supplement (doi:10.1007/s13592-025-01194-9), 2025-07-04
Supplement: MOESM5 [file 13592_2025_1194_MOESM5_ESM.docx]

**Trace element levels in Italian honeybees and wild plants: which factors matter?**

Apidologie

Gloria Isani1,2, Cecilia Rudelli 1*, Giulia Andreani1, Micaela Fabbri1, Chiara Suanno3, Luigi Parrotta3, Stefano Del Duca2,3

**Corresponding author:** Cecilia Rudelli,Department of Veterinary Medical Sciences, Alma Mater Studiorum-University of Bologna, Via Tolara di Sopra 50, Ozzano dell’Emilia, 40064 Bologna, Italy.

cecilia.rudelli2@unibo.it (Cecilia Rudelli)

**Supplementary Table SIII.** Levels of trace elements in bees sampled from the three organic and the three conventional apiaries. Values are given as the mean ± SD and expressed in µg/g wet weight and divided by samplings: T1, sampling in April 2022, and T2, sampling in July 2022. The mean refers to both samplings.

|  | Cu T1 | Cu  T2 | mean | Zn T1 | Zn  T2 | mean | Fe T1 | Fe T2 | mean |
| --- | --- | --- | --- | --- | --- | --- | --- | --- | --- |
| Organic | 4.53* | 4.23* | 4.41* | 31.3 | 32.3* | 31.7 | 56.6 | 46.3 | 52.7 |
| DS | 1.13 | 1.48 | 1.28 | 14.2 | 7.60 | 11.9 | 22.1 | 20.5 | 21.8 |
| Conventional | 3.84* | 6.34* | 5.09* | 35.7 | 39.7* | 37.7 | 54.8 | 40.6 | 47.9 |
| DS | 0.65 | 1.82 | 1.49 | 37.1 | 12.6 | 27.3 | 15.6 | 7.77 | 14.2 |

* indicates statistically significant differences (p<0.05) between organic and conventional apiaries
