# Supplementary material for: Trace element levels in Italian honeybees and wild plants: which factors matter?
Source: Springer Nature journal article supplement (doi:10.1007/s13592-025-01194-9), 2025-07-04
Supplement: MOESM7 [file 13592_2025_1194_MOESM7_ESM.docx]

**Trace element levels in Italian honeybees and wild plants: which factors matter?**

Apidologie

Gloria Isani1,2, Cecilia Rudelli 1*, Giulia Andreani1, Micaela Fabbri1, Chiara Suanno3, Luigi Parrotta3, Stefano Del Duca2,3

**Corresponding author:** Cecilia Rudelli,Department of Veterinary Medical Sciences, Alma Mater Studiorum-University of Bologna, Via Tolara di Sopra 50, Ozzano dell’Emilia, 40064 Bologna, Italy.

cecilia.rudelli2@unibo.it (Cecilia Rudelli)

**Supplementary Table SIX.** Average content of trace elements in wild plants sampled on the three organic and the three conventional apiaries. Values are given as the mean ± SD and expressed in µg/g dw and divided by sampling: T1, sampling in April 2022 and T2, sampling in July 2022. The mean refers to both samplings.

|  | Cu T1 | Cu T2 | mean | Zn T1 | Zn T2 | mean | Fe T1 | Fe T2 | mean |
| --- | --- | --- | --- | --- | --- | --- | --- | --- | --- |
| Organic | 5.92 | 7.51 | 6.87* | 32.4 | 30.1 | 31.7 | 119 | 179 | 142 |
| DS | 4.44 | 4.68 | 5.49 | 30.3 | 29.3 | 11.9 | 73.4 | 102.4 | 92.5 |
| Conventional | 8.07 | 10.2 | 9.12* | 44.9 | 52.0 | 48.5 | 146 | 130 | 138 |
| DS | 7.52 | 6.93 | 7.36 | 41.4 | 27.8 | 34.5 | 108 | 66.9 | 90.8 |

* indicates statistically significant differences (p<0.05) between organic and conventional apiaries.
