# Supplementary material for: Trace element levels in Italian honeybees and wild plants: which factors matter?
Source: Springer Nature journal article supplement (doi:10.1007/s13592-025-01194-9), 2025-07-04
Supplement: MOESM8 [file 13592_2025_1194_MOESM8_ESM.docx]

**Trace element levels in Italian honeybees and wild plants: which factors matter?**

Apidologie

Gloria Isani1,2, Cecilia Rudelli 1*, Giulia Andreani1, Micaela Fabbri1, Chiara Suanno3, Luigi Parrotta3, Stefano Del Duca2,3

**Corresponding author:** Cecilia Rudelli,Department of Veterinary Medical Sciences, Alma Mater Studiorum-University of Bologna, Via Tolara di Sopra 50, Ozzano dell’Emilia, 40064 Bologna, Italy.

cecilia.rudelli2@unibo.it (Cecilia Rudelli)

**Supplementary Table SV**. Random effects model for Cu content in bees.

| Output | Covariates | Estimate | p-value | Random effect p-value | AIC |
| --- | --- | --- | --- | --- | --- |
| Cu_bees | Intercept | 3.750556 | 0 |  | Fixed model 288.88 |
| Time T2 vs T1 | 1.252222 | 0 |  |
| Category Organic vs Conventional | -0.422778 | 0.3525 |  |
| Dimension medium vs large | 0.9716667 | 0.2177 |  | Random model 286.88 |
| Dimension small vs large | 1.167778 | 0.1402 |  |
| Farm_ID | - | - | 0.9998 |
