# Supplementary material for: Trace element levels in Italian honeybees and wild plants: which factors matter?
Source: Springer Nature journal article supplement (doi:10.1007/s13592-025-01194-9), 2025-07-04
Supplement: MOESM9 [file 13592_2025_1194_MOESM9_ESM.docx]

**Trace element levels in Italian honeybees and wild plants: which factors matter?**

Apidologie

Gloria Isani1,2, Cecilia Rudelli 1*, Giulia Andreani1, Micaela Fabbri1, Chiara Suanno3, Luigi Parrotta3, Stefano Del Duca2,3

**Corresponding author:** Cecilia Rudelli,Department of Veterinary Medical Sciences, Alma Mater Studiorum-University of Bologna, Via Tolara di Sopra 50, Ozzano dell’Emilia, 40064 Bologna, Italy.

cecilia.rudelli2@unibo.it (Cecilia Rudelli)

**Supplementary Table SVI.** Random effects model for Zn content in bees.

| Output | Covariates | Estimate | p-value | Random effect p-value | AIC |
| --- | --- | --- | --- | --- | --- |
| Zn_bees | Intercept | 50.2675 | 0.0149 |  | Fixed model 785.25 |
| Time T2 vs T1 | 0.8274 | 0.8275 |  |
| Category Organic vs Conventional | -10.5673 | 0.7283 |  |
| Dimension medium vs large | -22.8835 | 0.5926 |  | Random model 765.58 |
| Dimension small vs large | -13.5565 | 0.6638 |  |
| Farm_ID | - | - | 0.000003240 |
