# Supplementary material for: Trace element levels in Italian honeybees and wild plants: which factors matter?
Source: Springer Nature journal article supplement (doi:10.1007/s13592-025-01194-9), 2025-07-04
Supplement: MOESM10 [file 13592_2025_1194_MOESM10_ESM.docx]

**Trace element levels in Italian honeybees and wild plants: which factors matter?**

Apidologie

Gloria Isani1,2, Cecilia Rudelli 1*, Giulia Andreani1, Micaela Fabbri1, Chiara Suanno3, Luigi Parrotta3, Stefano Del Duca2,3

**Corresponding author:** Cecilia Rudelli,Department of Veterinary Medical Sciences, Alma Mater Studiorum-University of Bologna, Via Tolara di Sopra 50, Ozzano dell’Emilia, 40064 Bologna, Italy.

cecilia.rudelli2@unibo.it (Cecilia Rudelli)

**Supplementary Table SVII.** Spearman correlation rho and p-value calculated for trace elements in honey-bees and wild herbs.

| **TIME** | **TEST** |  | **Cu_bees** | **Zn_bees** | **Fe_bees** | **Cu_herbs** | **Zn_herbs** | **Fe_herbs** |
| --- | --- | --- | --- | --- | --- | --- | --- | --- |
| **T1** | **Matrix Spearman correlation rho** | **Cu_bees** |  | 0.18744 | -0.46204 | -0.1239 | -0.039782 | 0.21134 |
| **Zn_bees** | 0.18744 |  | 0.2212 | 0.30521 | 0.35304 | 0.089237 |
| **Fe_bees** | -0.46204 | 0.2212 |  | 0.30838 | 0.33249 | -0.031407 |
| **Cu_herbs** | -0.12393 | 0.30521 | 0.30838 |  | 0.86729 | 0.2145 |
| **Zn_herbs** | -0.03978 | 0.35304 | 0.33249 | 0.86729 |  | 0.24789 |
| **Fe_herbs** | 0.21134 | 0.08923 | -0.031407 | 0.2145 | 0.24789 |  |
|  |  |  |  |  |  |  |  |
|  |  | **Cu_bees** | **Zn_bees** | **Fe_bees** | **Cu_herbs** | **Zn_herbs** | **Fe_herbs** |
| **Matrix Spearman correlation p-value** | **Cu_bees** |  | 0.1207 | 0.0002 | 0.3494 | 0.7622 | 0.1099 |
| **Zn_bees** | 0.1207 |  | 0.0616 | 0.0203 | 0.0067 | 0.5077 |
| **Fe_bees** | 0.0002 | 0.0616 |  | 0.0186 | 0.0108 | 0.8146 |
| **Cu_herbs** | 0.3494 | 0.0203 | 0.0186 |  | 0.0001 | 0.0195 |
| **Zn_herbs** | 0.7622 | 0.0067 | 0.0108 | 0.0001 |  | 0.0059 |
| **Fe_herbs** | 0.1099 | 0.5077 | 0.8146 | 0.0195 | 0.0059 |  |
|  |  |  |  |  |  |  |  |  |
| **TIME** | **TEST** |  | **Cu_bees** | **Zn_bees** | **Fe_bees** | **Cu_herbs** | **Zn_herbs** | **Fe_herbs** |
| **T2** | **Matrix Spearman correlation rho** | **Cu_bees** |  | 0.23688 | -0.4214 | 0.024956 | 0.10088 | -0.076006 |
| **Zn_bees** | 0.23688 |  | 0.17934 | -0.2196 | -0.23038 | -0.24078 |
| **Fe_bees** | -0.4214 | 0.17934 |  | 0.05102 | 0.097172 | -0.080644 |
| **Cu_herbs** | 0.024956 | -0.2196 | 0.05102 |  | 0.845 | 0.18721 |
| **Zn_herbs** | 0.10088 | -0.23038 | 0.097172 | 0.845 |  | 0.15935 |
| **Fe_herbs** | -0.076006 | -0.24078 | -0.080644 | 0.18721 | 0.15935 |  |
|  |  |  |  |  |  |  |  |
|  |  | **Cu_bees** | **Zn_bees** | **Fe_bees** | **Cu_herbs** | **Zn_herbs** | **Fe_herbs** |
| **Matrix Spearman correlation p-value** | **Cu_bees** |  | 0.0241 | 0.0003 | 0.8106 | 0.3384 | 0.4752 |
| **Zn_bees** | 0.0241 |  | 0.0952 | 0.0387 | 0.029 | 0.0217 |
| **Fe_bees** | 0.0003 | 0.0952 |  | 0.6312 | 0.3683 | 0.4469 |
| **Cu_herbs** | 0.8106 | 0.0387 | 0.6312 |  | 0.0001 | 0.0437 |
| **Zn_herbs** | 0.3384 | 0.029 | 0.3683 | 0.0001 |  | 0.0852 |
| **Fe_herbs** | 0.4752 | 0.0217 | 0.4469 | 0.0437 | 0.0852 |  |
