# Supplementary material for: Trace element levels in Italian honeybees and wild plants: which factors matter?
Source: Springer Nature journal article supplement (doi:10.1007/s13592-025-01194-9), 2025-07-04
Supplement: MOESM11 [file 13592_2025_1194_MOESM11_ESM.docx]

**Trace element levels in Italian honeybees and wild plants: which factors matter?**

Apidologie

Gloria Isani1,2, Cecilia Rudelli 1*, Giulia Andreani1, Micaela Fabbri1, Chiara Suanno3, Luigi Parrotta3, Stefano Del Duca2,3

**Corresponding author:** Cecilia Rudelli,Department of Veterinary Medical Sciences, Alma Mater Studiorum-University of Bologna, Via Tolara di Sopra 50, Ozzano dell’Emilia, 40064 Bologna, Italy.

cecilia.rudelli2@unibo.it (Cecilia Rudelli)

**Supplementary Table SVIII.**

| **Apiary 1** | **Organic – Small N° of hives 200-300** |
| --- | --- |
| Wild plants | *Sulla coronaria* (Fabaceae)  *Acer campestre* (Sapindaceae)  *Ulmus minor* (Ulmaceae)  *Coriandrum sativum* (Apiaceae),  *Medicago sativa* or Alfa Alfa (Fabaceae)  *Robinia pseudoacacia* (Fabaceae)  *Leucanthemum vulgare* (Asteraceae)  *Taraxacum officinale* (Asteraceae) |
| Cultivated plants | *Brassica oleracea* (Brassicaceae)  *Sorghum bicolor* (Poaceae) |
| **Apiary 2** | **Conventional – Small N° of hives 200-300** |
| Wild plants | *Arundo donax* (Poacee)  *Typha latifolia* (Typhaceae)  *Populus (Salicaceae)*  *Salix* (Salicaceae)  *Ulmus minor* (Ulmaceae)  *Alnus glutinosa* (Betulaceae)  *Sambucus nigra* (Caprifoliaceae)  *Robinia pseudoacacia* (Fabaceae)  Asteraceae, Fabaceae, Planctaginaceae and Araliaceae |
| Cultivated plants | *Malus domestica, Pyrus communis and Prunus avium* (Rosacee)  *Actinidia chinensis* (Actinidiacee)  *Asparagus officinalis* (Asparagacee) |
| **Apiary 3** | **Organic – Medium N° of hives 900-1300** |
| Wild plants | *Medicago sativa* or Alfa Alfa (Fabaceae)  *Onobrychis viciifolia* (Fabaceae)  *Sideritis* (Lamiaceae)  *Satureja* (Lamiaceae)  *Prunus amygdalus* (Rosaceae) |
| Cultivated plants | Not present |
| **Apiary 4** | **Conventional – Medium N° of hives 900-1300** |
| Wild plants | *Robinia pseudoacacia* (Fabaceae)  *Ailanthus altissima* (Simaroubaceae)  *Sambucus nigra* (Caprifoliaceae)  *Rubus* (Rosaceae)  *Populus (Salicaceae)*  *Quercus* (Fagaceae)  *Leucanthemum vulgare* (Asteraceae)  *Taraxacum officinale* (Asteraceae)  Asteraceae, Apiaceae, Graminacee |
| Cultivated plants | *Vitis vinifera* (Vitaceae)  *Olea europaea* (Oleaceae)  Brassicaceae |
| **Apiary 5** | **Organic – Big N° of hives > 1300** |
| Wild plants | *Robinia pseudoacacia* (Fabaceae)  *Rubus and other* Rosaceae  *Ailanthus altissima* (Simaroubaceae)  *Acer* (Sapindaceae)  *Fagus* (Fagaceae)  *Quercus* (Fagaceae)  Rosaceae, Asteraceae  *Leucanthemum vulgare* (Asteraceae)  *Taraxacum officinale* (Asteraceae) |
| Cultivated plants | Not present |
| **Apiary 6** | **Conventional – Big N° of hives > 1300** |
| Wild plants | *Amorpha fruticosa* (Fabaceae)  *Robinia pseudoacacia* (Fabaceae)  *Mimosa* (Fabaceae)  *Fraxinus ornus* (Oleaceae)  *Buddleja* (Buddlejeaceae)  *Prunus avium* (Rosacee)  *Populus (Salicaceae)*  *Hedera helix* (Araliaceae)  *Veronica persica* (Planctaginaceae)  *Leucanthemum vulgare* (Asteraceae)  *Taraxacum officinale* (Asteraceae) |
| Cultivated plants | Not present |
